# Supplementary material
Source: publisher site journal article supplement (https://www.dovepress.com/article/171293)
Supplement: Supplementary file 1 [file get_supplementary_file.php]

**Supplementary material**

**
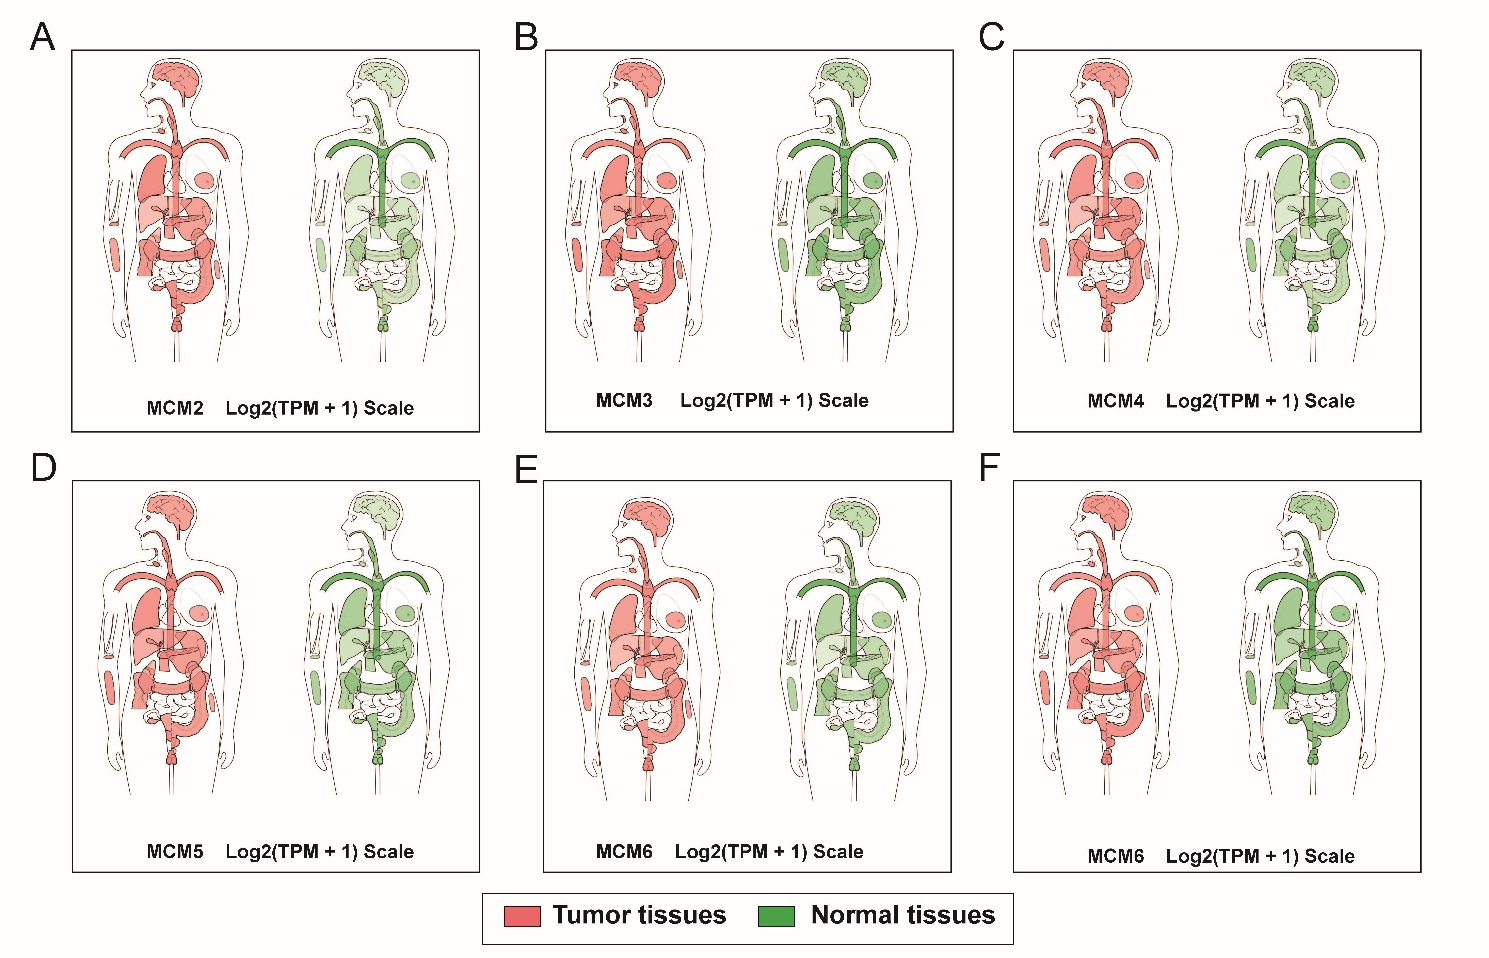
**

**Figure S1.** Expression distribution of MCM2–7 in human tumor tissue and adjacent normal tissues that carry out by GEPIA.

**Notes**: Interactive bodymap of *MCM2* (A); *MCM3* (B); *MCM4* (C); *MCM5* (D); *MCM6* (E); *MCM7* (F)*.*

**Abbreviations**:MCM, minichromosome maintenance; GEPIA, Gene Expression Profiling Interactive Analysis.

**
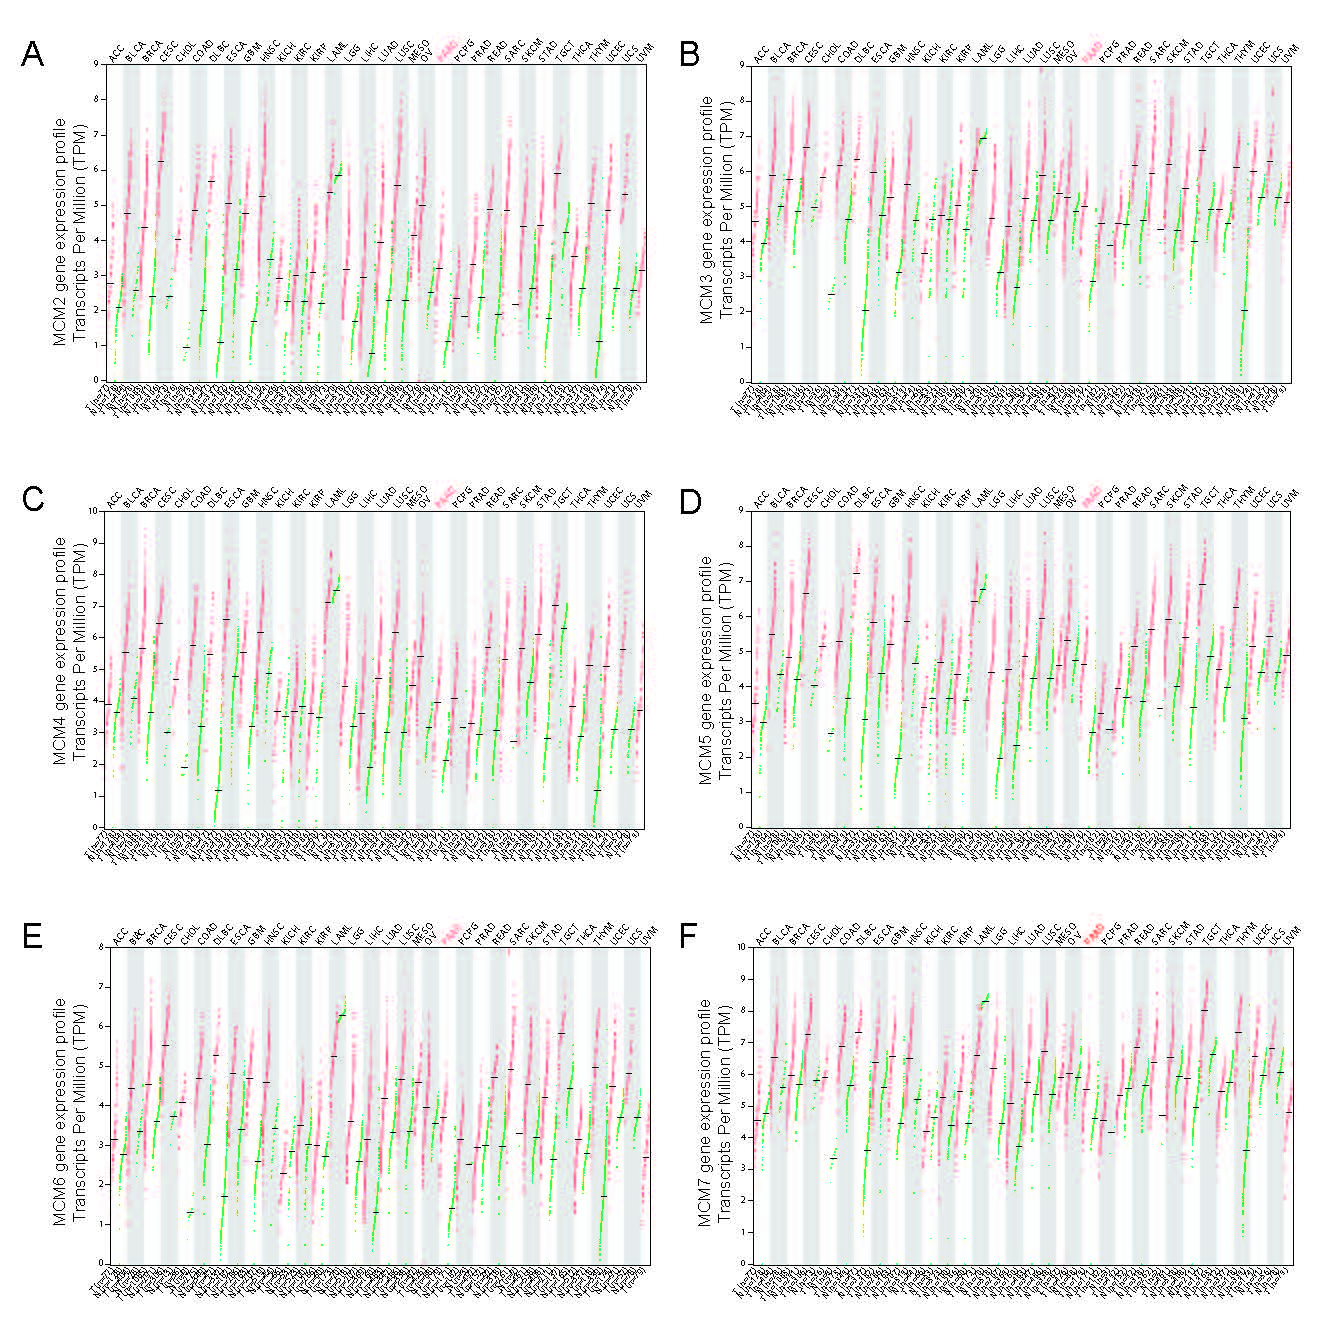
**

**Figure S2.** The MCM2–7 gene expression profile across all tumor samples and paired normal tissues (Dot plot).

**Notes**: Red dots represent tumor tissue, and green dots represent tumor tissue.

**Abbreviations**:MCM, minichromosome maintenance.

**
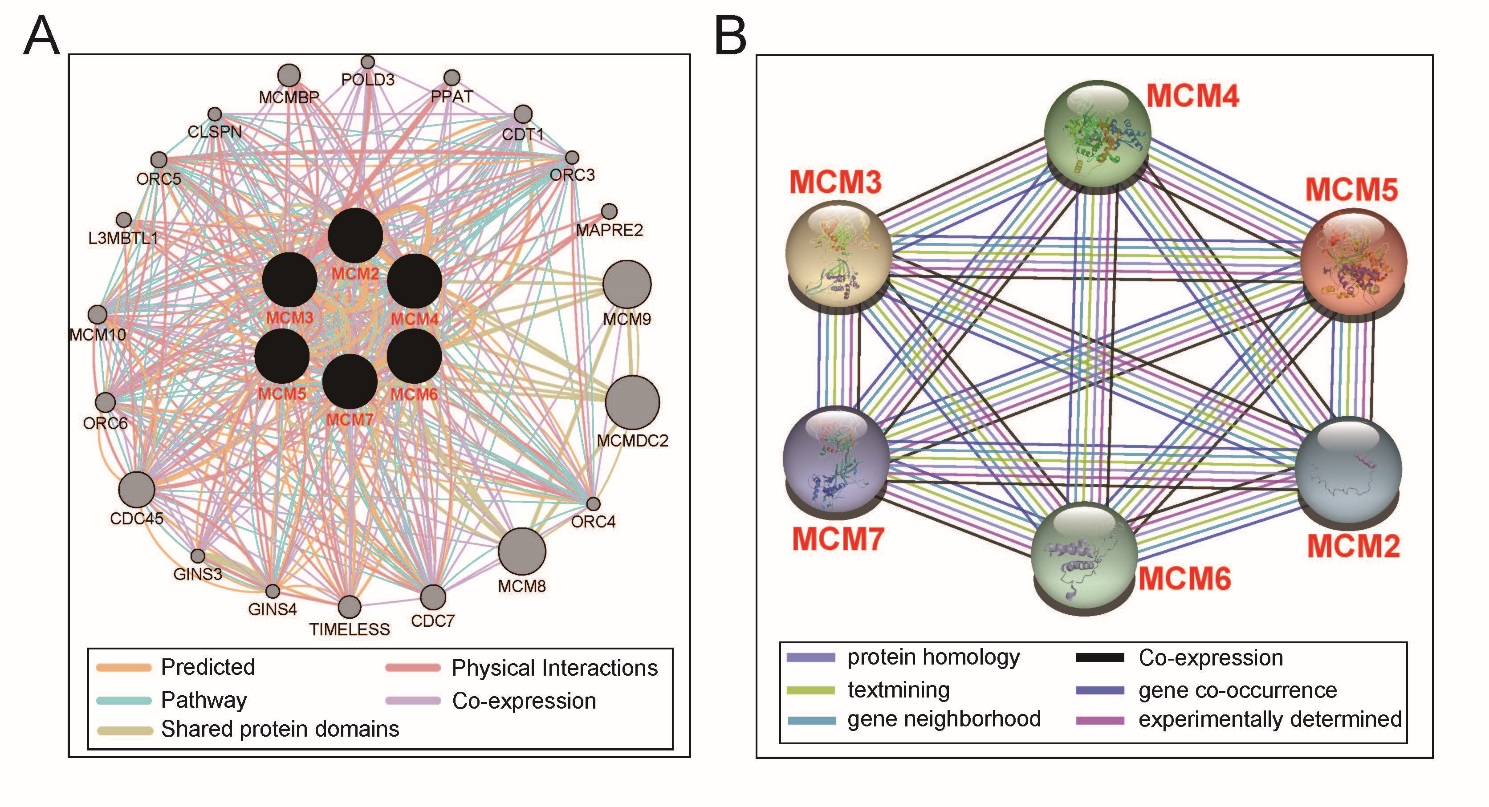
**

**Figure S3.** Protein-protein and gene-gene interaction networks.

**Notes**: (A) Protein–protein interaction networks; (B) GeneMANIA interaction networks.

**Abbreviations**:GeneMANIA, Gene Multiple Association Network Integration Algorithm.
